# Supplementary material
Source: PubMed Central journal article supplement (PMC9259009)
Supplement: mmc1.pdf [file mmc1.pdf]

# THE LANCET

## Supplementary appendix

This appendix formed part of the original submission. We post it as supplied by the authors.

Supplement to: Goga A, Bekker L-G, Garrett N, et al. Breakthrough SARS-CoV-2 infections during periods of delta and omicron predominance, South Africa. *Lancet* 2022; published online July 6. [https://doi.org/10.1016/S0140-6736\(22\)01190-4](https://doi.org/10.1016/S0140-6736(22)01190-4).

## Appendix 1

**Table 1: Characteristics of Health Care Worker Breakthrough Infections during the Delta and Omicron periods**

| Characteristics of BTIs in the first 78-days                     | Delta period<br>N=15195       |      | Omicron period<br>N=26393       |      | Adjusted OR for comparisons between Omicron and Delta* (95% CI) |
|------------------------------------------------------------------|-------------------------------|------|---------------------------------|------|-----------------------------------------------------------------|
|                                                                  | N                             | %    | N                               | %    |                                                                 |
| <b>Sex</b>                                                       |                               |      |                                 |      |                                                                 |
| Female                                                           | 11540                         | 75.9 | 20655                           | 78.3 | Reference                                                       |
| Male                                                             | 3655                          | 24.1 | 5738                            | 21.7 | 0.89 (0.85-0.94)                                                |
| <b>Age</b>                                                       |                               |      |                                 |      |                                                                 |
| 18-30                                                            | 2214                          | 14.6 | 5342                            | 20.2 | Reference                                                       |
| 31-54                                                            | 9919                          | 65.3 | 17583                           | 66.6 | 0.72 (0.69-0.76)                                                |
| 55+                                                              | 3062                          | 20.2 | 3467                            | 13.1 | 0.47 (0.44-0.50)                                                |
| <b>Characteristics of hospitalized BTIs in the first 78-days</b> | <b>Delta period<br/>n=850</b> |      | <b>Omicron period<br/>n=882</b> |      | Adjusted OR for comparisons between Omicron and Delta* (95% CI) |
|                                                                  |                               |      |                                 |      |                                                                 |
| <b>Sex</b>                                                       |                               |      |                                 |      |                                                                 |
| Female                                                           | 628                           | 73.9 | 739                             | 83.8 | Reference                                                       |
| Male                                                             | 222                           | 26.1 | 143                             | 16.2 | 0.61 (0.48-0.78)                                                |
| <b>Age</b>                                                       |                               |      |                                 |      |                                                                 |
| 18-30                                                            | 52                            | 6.1  | 130                             | 14.7 | Reference                                                       |
| 31-54                                                            | 514                           | 60.5 | 588                             | 66.7 | 0.44 (0.31-0.62)                                                |
| 55+                                                              | 284                           | 33.4 | 164                             | 18.6 | 0.24 (0.16-0.35)                                                |
| <b>Co-morbidities</b>                                            |                               |      |                                 |      |                                                                 |
| HIV (8%)                                                         | 48                            | 5.6  | 77                              | 8.7  | 1.54 (1.05-2.25)                                                |
| Hypertension (16%)                                               | 295                           | 34.7 | 188                             | 21.3 | 0.64 (0.51-0.80)                                                |
| Diabetes (6%)                                                    | 192                           | 22.6 | 92                              | 10.4 | 0.53 (0.40-0.70)                                                |
| <b>Ward on admission</b>                                         |                               |      |                                 |      |                                                                 |
| General Ward                                                     | 756                           | 88.9 | 797                             | 90.4 | Reference                                                       |
| High care                                                        | 38                            | 4.5  | 56                              | 6.3  | 1.66 (1.08-2.53)                                                |
| Intensive Care Unit                                              | 56                            | 6.6  | 29                              | 3.3  | 0.70 (0.42-1.14)                                                |
| <b>Care needed in hospital</b>                                   |                               |      |                                 |      |                                                                 |
| Ever Ventilated‡                                                 | 61                            | 7.4  | 13                              | 1.5  | 0.24 (0.12-0.46)                                                |

|                  |     |      |     |      |                  |
|------------------|-----|------|-----|------|------------------|
| Ever Oxygenated‡ | 343 | 41.9 | 138 | 16.1 | 0.29 (0.25-0.40) |
|------------------|-----|------|-----|------|------------------|

\* Adjusted odds ratios, assessing the effect of age and gender on Omicron vs Delta infection were computed using logistic regression including the variable “Province” adjusting for clustering within patient for repeated events. Similar analysis was conducted for hospitalization.

‡ two separate models were fitted for ever ventilated and ever oxygenated, each adjusted for age, gender, province, clustering, HIV, hypertension, diabetes, and ward.
